# Supplementary material for: Optical imaging in tissue with X-ray excited luminescent sensors
Source: Royal Society of Chemistry journal article supplement (doi:10.1039/c0an00931h), 2011-01-01
Supplement: c0an00931h.pdf [file c0an00931h.pdf]

# Supplementary information

## Optical imaging in tissue with X-ray excited luminescent sensors

Hongyu Chen,<sup>a</sup> David E. Longfield,<sup>a</sup> Venkata S. Varahagiri,<sup>ab</sup> KhanhVan T. Nguyen,<sup>a</sup> Amanda L. Patrick,<sup>a</sup> Haijun Qian,<sup>c</sup> Donald G. VanDerveer,<sup>a</sup> Jeffrey N. Anker<sup>3a</sup>

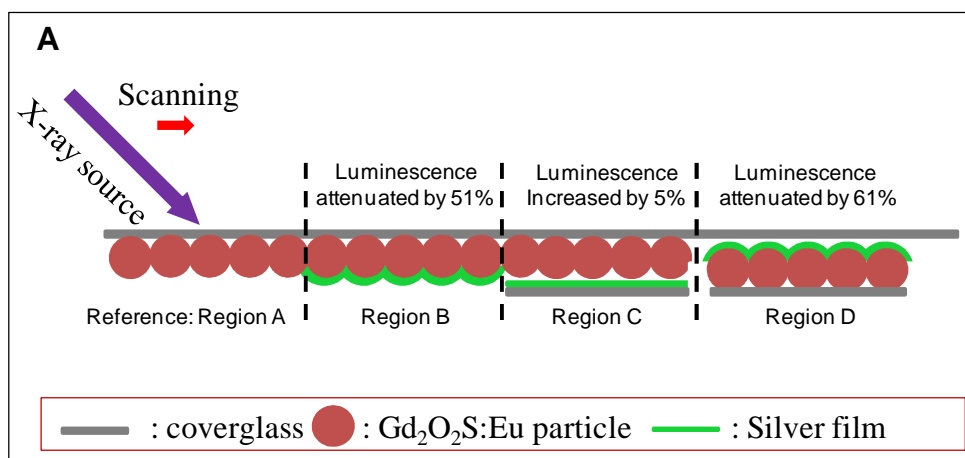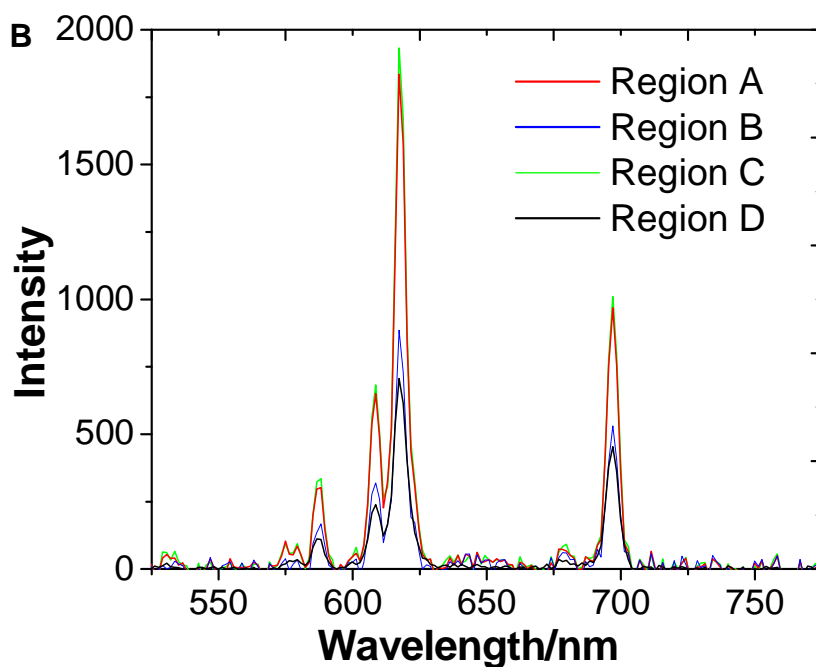

**Fig. S1.** (A) Schematic showing the effect of a 5 nm silver island film upon XEOL from a single layer of  $\text{Gd}_2\text{O}_2\text{S}:\text{Eu}$  phosphors. Region A: uncoated reference; Region B: silver coated below phosphor; Region C, silver placed on a glass slide below; Region D, silver coated above. Above each region, the measured attenuation at 617 nm is labeled. (B) Luminescence spectra from regions A-D.
